# Supplementary material for: Transimulation - Protein Biosynthesis Web Service
Source: PubMed Central journal article supplement (PMC3764131; doi:10.1371/journal.pone.0073943), 2013-09-05

**Figure S1:** Distributions of log fold differences for comparisons of protein abundances calculated in our model (as  $b$  times  $x$ ) and obtained in experimental studies.

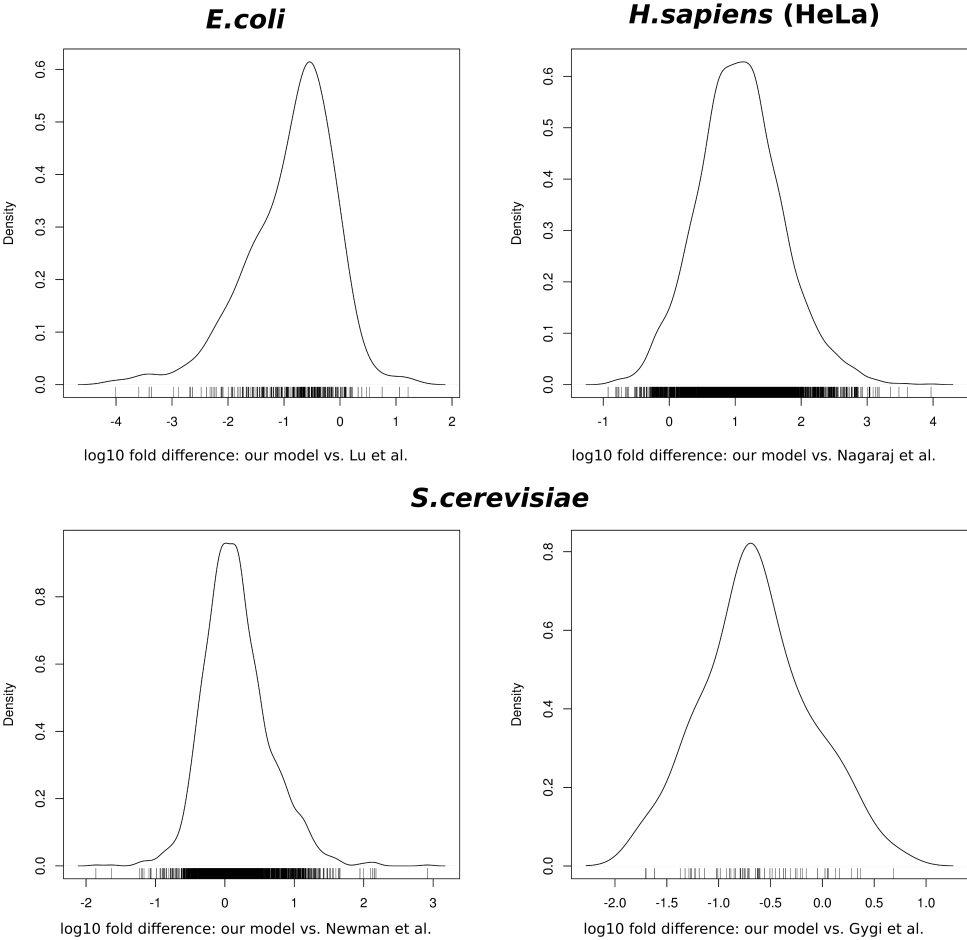

Supplement: pone.0073943.s001.pdf [file pone.0073943.s001.pdf]
