# Supplementary material for: Transimulation - Protein Biosynthesis Web Service
Source: PubMed Central journal article supplement (PMC3764131; doi:10.1371/journal.pone.0073943), 2013-09-05
Supplement: pone.0073943.s003.pdf [file pone.0073943.s003.pdf]

Table S1: The list of 69 orthologous genes used in the analysis of evolutionary conservation of translational parameters. The list was prepared on the basis of Inparanoid database (Ostlund et al. 2009).

| <i>S.cerevisiae</i> | <i>H.sapiens</i> | <i>E.coli</i> |
|---------------------|------------------|---------------|
| YBL022C             | NM_004793        | b0439         |
| YBL036C             | NM_007198        | b2951         |
| YBL039C             | NM_001905        | b2780         |
| YBR003W             | NM_014317        | b3187         |
| YBR196C             | NM_000175        | b4025         |
| YBR227C             | NM_006660        | b0438         |
| YCR012W             | NM_000291        | b2926         |
| YDL055C             | NM_013334        | b2039         |
| YDL104C             | NM_022353        | b3064         |
| YDL168W             | NM_000671        | b0356         |
| YDL219W             | NM_080820        | b3887         |
| YDL236W             | NM_001042371     | b0675         |
| YDR047W             | NM_000374        | b3997         |
| YDR050C             | NM_001159287     | b3919         |
| YDR298C             | NM_001697        | b3735         |
| YDR304C             | NM_000942        | b0525         |
| YDR456W             | NM_001042537     | b4065         |
| YEL029C             | NM_003681        | b1636         |
| YER023W             | NM_006907        | b0386         |
| YER163C             | NM_001008708     | b1218         |
| YFL018C             | NM_000108        | b0116         |
| YFR009W             | NM_018358        | b3352         |
| YFR031C             | NM_001042550     | b0397         |
| YFR047C             | NM_014298        | b0109         |
| YGL018C             | NM_172002        | b2527         |
| YGL236C             | NM_001123226     | b3741         |
| YGR155W             | NM_000071        | b2414         |
| YGR244C             | NM_003850        | b0728         |
| YGR255C             | NM_182476        | b2907         |
| YJL026W             | NM_001034        | b2235         |
| YJL035C             | NM_182503        | b2559         |
| YJL060W             | NM_001008661     | b0600         |
| YJL068C             | NM_001984        | b2154         |
| YJR019C             | NM_005469        | b0452         |
| YKL104C             | NM_005110        | b3729         |
| YKL184W             | NM_002539        | b2838         |
| YKR080W             | NM_006636        | b0529         |
| YLL041C             | NM_003000        | b0724         |
| YLR027C             | NM_002079        | b0928         |
| YLR069C             | NM_024996        | b3340         |
| YLR244C             | NM_015143        | b0168         |
| YLR289W             | NM_021927        | b2569         |
| YLR351C             | NM_020202        | b0219         |
| YLR354C             | NM_006755        | b2464         |
| YLR359W             | NM_000026        | b1131         |
| YLR382C             | NM_015340        | b0642         |
| YML021C             | NM_003362        | b2580         |
| YML080W             | NM_022156        | b3260         |
| YMR120C             | NM_004044        | b4006         |
| YMR300C             | NM_002703        | b2312         |
| YNL218W             | NM_020135        | b0892         |
| YNR041C             | NM_015697        | b4040         |
| YOL096C             | NM_017421        | b2232         |
| YOR095C             | NM_144563        | b2914         |
| YOR136W             | NM_005530        | b1136         |
| YOR142W             | NM_003849        | b0729         |
| YOR157C             | NM_002799        | b3932         |
| YOR243C             | NM_019042        | b2745         |
| YOR274W             | NM_017646        | b4171         |
| YOR386W             | NM_004075        | b0708         |
| YPL040C             | NM_018060        | b0026         |
| YPL059W             | NM_016417        | b1654         |
| YPL091W             | NM_000637        | b3500         |
| YPL097W             | NM_001040436     | b1637         |
| YPL104W             | NM_018122        | b1866         |
| YPL172C             | NM_001303        | b0428         |
| YPL262W             | NM_000143        | b1611         |
| YPL266W             | NM_014473        | b0051         |
| YPR047W             | NM_006567        | b1714         |
