# Supplementary material for: Transimulation - Protein Biosynthesis Web Service
Source: PubMed Central journal article supplement (PMC3764131; doi:10.1371/journal.pone.0073943), 2013-09-05
Supplement: pone.0073943.s004.pdf [file pone.0073943.s004.pdf]

Table S2: Decoding specificities of yeast and human tRNAs and calculated values of the model parameters. Column descriptions: (1) tRNA number; (2) codons recognized by a tRNA molecule; (3) tRNA anticodon; (4) coded amino acid; (5)  $D$  – diffusion coefficient of a aa-tRNA molecule in  $10^{-11}$  m<sup>2</sup>/s; (6)  $n$  – the number of tRNA molecules in a cell; and (7)  $F$  – arrival frequency of a aa-tRNA molecule to the vacant A site of a ribosome in s<sup>-1</sup>. Similar table for *E.coli* may be found in the original work of Fluitt et al. 2007.

| <i>S.cerevisiae</i> |             |           |            |        |        |        |
|---------------------|-------------|-----------|------------|--------|--------|--------|
| nr                  | codons      | anticodon | amino acid | $D$    | $n$    | $F$    |
| 1                   | GCA,GCG     | UGC       | Ala        | 0.2571 | 51437  | 270.27 |
| 2                   | GCU,GCC     | IGC       | Ala        | 0.2571 | 113163 | 588.24 |
| 3                   | AGA         | UCU       | Arg        | 0.2568 | 113163 | 588.24 |
| 4                   | AGG         | CCU       | Arg        | 0.2568 | 10289  | 54.64  |
| 5                   | CGG         | CCG       | Arg        | 0.2568 | 10289  | 54.64  |
| 6                   | CGU,CGC,CGA | ICG       | Arg        | 0.2568 | 61726  | 322.58 |
| 7                   | AAU,AAC     | GUU       | Asn        | 0.2570 | 102875 | 555.56 |
| 8                   | GAU,GAC     | GUC       | Asp        | 0.2570 | 154315 | 833.33 |
| 9                   | UGU,UGC     | GCA       | Cys        | 0.2570 | 41152  | 217.39 |
| 10                  | CAA         | UUG       | Gln        | 0.2569 | 92589  | 500.00 |
| 11                  | CAG         | CUG       | Gln        | 0.2569 | 10289  | 54.64  |
| 12                  | GAA         | UUC       | Glu        | 0.2569 | 144026 | 769.23 |
| 13                  | GAG         | CUC       | Glu        | 0.2569 | 20574  | 109.89 |
| 14                  | GGA         | UCC       | Gly        | 0.2572 | 30863  | 163.93 |
| 15                  | GGG         | CCC       | Gly        | 0.2572 | 20574  | 109.89 |
| 16                  | GGU,GGC     | GCC       | Gly        | 0.2572 | 164601 | 909.09 |
| 17                  | CAU,CAC     | GUG       | His        | 0.2569 | 72012  | 384.62 |
| 18                  | AUA         | UAU       | Ile        | 0.2570 | 20574  | 109.89 |
| 19                  | AUC,AUU     | IAU       | Ile        | 0.2570 | 133738 | 714.29 |
| 20                  | CUA,CUG     | UAG       | Leu        | 0.2570 | 30863  | 163.93 |
| 21                  | CUC,CUU     | GAG       | Leu        | 0.2570 | 10289  | 54.64  |
| 22                  | UUA         | UAA       | Leu        | 0.2570 | 72012  | 384.62 |
| 23                  | UUG         | CAA       | Leu        | 0.2570 | 102875 | 555.56 |
| 24                  | AAA         | UUU       | Lys        | 0.2569 | 72012  | 384.62 |
| 25                  | AAG         | CUU       | Lys        | 0.2569 | 144026 | 769.23 |
| 26                  | AUG         | CAU       | Met        | 0.2569 | 51437  | 270.27 |
| 27                  | UUU,UUC     | GAA       | Phe        | 0.2568 | 102875 | 555.56 |
| 28                  | CCA,CCG     | UGG       | Pro        | 0.2570 | 102875 | 555.56 |
| 29                  | CCU,CCC     | IGG       | Pro        | 0.2570 | 20574  | 109.89 |
| 30                  | AGU,AGC     | GCU       | Ser        | 0.2571 | 41152  | 217.39 |
| 31                  | UCA         | UGA       | Ser        | 0.2571 | 30863  | 163.93 |
| 32                  | UCG         | CGA       | Ser        | 0.2571 | 10289  | 54.64  |
| 33                  | UCU,UCC     | IGA       | Ser        | 0.2571 | 113163 | 588.24 |
| 34                  | ACA         | UGU       | Thr        | 0.2570 | 41152  | 217.39 |
| 35                  | ACG         | CGU       | Thr        | 0.2570 | 10289  | 54.64  |
| 36                  | ACU,ACC     | IGU       | Thr        | 0.2570 | 113163 | 588.24 |
| 37                  | UGG         | CCA       | Trp        | 0.2567 | 61726  | 322.58 |
| 38                  | UAU,UAC     | GUA       | Tyr        | 0.2568 | 82300  | 434.78 |
| 39                  | GUA         | UAC       | Val        | 0.2570 | 20574  | 109.89 |
| 40                  | GUG         | CAC       | Val        | 0.2570 | 20574  | 109.89 |
| 41                  | GUU,GUC     | IAC       | Val        | 0.2570 | 144026 | 769.23 |

*H.sapiens*

| nr | codons          | anticodon   | amino acid | <i>D</i> | <i>n</i> | <i>F</i> |
|----|-----------------|-------------|------------|----------|----------|----------|
| 1  | GCU,GCC,GCA,GCG | IGC,CGC,UGC | Ala        | 0.2571   | 1513793  | 138.89   |
| 2  | GCU,GCC         | IGC         | Ala        | 0.2571   | 1611009  | 149.25   |
| 3  | AGG             | CCU         | Arg        | 0.2568   | 1753677  | 161.29   |
| 4  | CGU,CGC         | ICG         | Arg        | 0.2568   | 1326936  | 121.95   |
| 5  | AGA             | UCU         | Arg        | 0.2568   | 1762515  | 161.29   |
| 6  | CGG,CGA         | CCG,UCG     | Arg        | 0.2568   | 1294110  | 119.05   |
| 7  | AAU,AAC         | GUU         | Asn        | 0.2570   | 1128717  | 104.17   |
| 8  | GAU,GAC         | GUC         | Asp        | 0.2570   | 1385014  | 128.21   |
| 9  | UGU,UGC         | GCA         | Cys        | 0.2570   | 1195632  | 109.89   |
| 10 | CAA,CAG         | CUG,UUG     | Gln        | 0.2569   | 1164068  | 107.53   |
| 11 | GAA             | UUC         | Glu        | 0.2569   | 1152705  | 106.38   |
| 12 | GAA,GAG         | CUC,UUC     | Glu        | 0.2569   | 1060539  | 98.04    |
| 13 | GGC,GGU,GGG     | CCC,GCC     | Gly        | 0.2572   | 1204469  | 111.11   |
| 14 | GGA             | UCC         | Gly        | 0.2572   | 1482230  | 136.99   |
| 15 | CAU,CAC         | GUG         | His        | 0.2569   | 1927909  | 178.57   |
| 16 | AUU,AUC         | IAU         | Ile        | 0.2570   | 1353450  | 125.00   |
| 17 | AUA             | UAU         | Ile        | 0.2570   | 1871094  | 172.41   |
| 18 | UUG             | CAA         | Leu        | 0.2570   | 1492330  | 136.99   |
| 19 | CUG             | CAG         | Leu        | 0.2570   | 1623635  | 149.25   |
| 20 | UUA,UUG         | UAA         | Leu        | 0.2570   | 1844581  | 169.49   |
| 21 | CUU,CUC,CUA     | IAG,UAG     | Leu        | 0.2570   | 1103466  | 102.04   |
| 22 | AAG             | CUU         | Lys        | 0.2569   | 1071902  | 99.01    |
| 23 | AAA             | UUU         | Lys        | 0.2569   | 1781453  | 163.93   |
| 24 | AAA             | UUU         | Lys        | 0.2569   | 1656461  | 151.52   |
| 25 | AAA             | UUU         | Lys        | 0.2569   | 1359763  | 125.00   |
| 26 | AUG             | CAU         | Met        | 0.2569   | 1592071  | 147.06   |
| 27 | UUU,UUC         | GAA         | Phe        | 0.2568   | 1453191  | 133.33   |
| 28 | CCU,CCC,CCA,CCG | IGG,CGG,UGG | Pro        | 0.2570   | 1160280  | 107.53   |
| 29 | UGA             | UCA         | Sec        | 0.2570   | 2011237  | 185.19   |
| 30 | UCG             | CGA         | Ser        | 0.2571   | 1881194  | 172.41   |
| 31 | AGU,AGC         | GCU         | Ser        | 0.2571   | 1699388  | 156.25   |
| 32 | UCU,UCC,UCA     | IGA,UGA     | Ser        | 0.2571   | 1671612  | 153.85   |
| 33 | ACG             | CGU         | Thr        | 0.2570   | 1266334  | 116.28   |
| 34 | ACU,ACC,ACG     | IGU,CGU     | Thr        | 0.2570   | 1252446  | 114.94   |
| 35 | ACA             | UGU         | Thr        | 0.2570   | 1778928  | 163.93   |
| 36 | ACA             | UGU         | Thr        | 0.2570   | 1587021  | 147.06   |
| 37 | UGG             | CCA         | Trp        | 0.2567   | 2080677  | 192.31   |
| 38 | UAU,UAC         | GUA         | Tyr        | 0.2568   | 1367338  | 126.58   |
| 39 | GUU,GUC,GUG     | IAC,CAC     | Val        | 0.2570   | 1564295  | 144.93   |
| 40 | GUA             | UAC         | Val        | 0.2570   | 1512531  | 138.89   |
