# Supplementary material for: Transimulation - Protein Biosynthesis Web Service
Source: PubMed Central journal article supplement (PMC3764131; doi:10.1371/journal.pone.0073943), 2013-09-05
Supplement: pone.0073943.s005.pdf [file pone.0073943.s005.pdf]

Table S3: The list of codons and their corresponding tRNAs. Column descriptions: (1) codons recognized by a tRNA molecule; (2,3) cognate and near-cognate tRNAs labeled as per Table S2; (4) competition rate  $C$ ; and (5) competition rate  $R$ . Similar table for *E.coli* may be found in the original work of Fluit et al. 2007.

| <i>S.cerevisiae</i> |               |                    |       |        |
|---------------------|---------------|--------------------|-------|--------|
| codon               | cognate tRNAs | near-cognate tRNAs | $C$   | $R$    |
| AAA                 | 24            | 3,7,18,25,34       | 5.82  | 31.51  |
| AAC                 | 7             | 24,25,30           | 2.47  | 23.07  |
| AAG                 | 25            | 4,7,24,26,35       | 1.72  | 16.45  |
| AAU                 | 7             | 19,24,25,36        | 4.42  | 21.12  |
| ACA                 | 34            | 3,18,24,35,36      | 7.94  | 58.89  |
| ACC                 | 36            | 7,30,34,35         | 1.78  | 22.29  |
| ACG                 | 35            | 4,25,26,34,36      | 34.77 | 234.07 |
| ACU                 | 36            | 19,34,35           | 1.68  | 22.39  |
| AGA                 | 3             | 4,18,24,30,34      | 1.67  | 22.39  |
| AGC                 | 30            | 3,4,7              | 5.51  | 61.31  |
| AGG                 | 4             | 3,25,26,30,35      | 34.77 | 234.07 |
| AGU                 | 30            | 3,4,19,36          | 8.95  | 57.88  |
| AUA                 | 18            | 3,19,24,26,34      | 19.79 | 113.39 |
| AUC                 | 19            | 7,18,26,30         | 1.61  | 18.03  |
| AUG                 | 26            | 4,18,19,25,35      | 6.30  | 47.26  |
| AUU                 | 19            | 18,26,36           | 1.36  | 18.29  |
| CAA                 | 10            | 11,17,20,28        | 2.32  | 26.17  |
| CAC                 | 17            | 10,11,21           | 1.58  | 35.75  |
| CAG                 | 11            | 5,10,17            | 17.19 | 251.65 |
| CAU                 | 17            | 6,10,11,29         | 2.57  | 34.77  |
| CCA                 | 28            | 10,20,29           | 1.39  | 24.15  |
| CCC                 | 29            | 17,21,28           | 9.05  | 124.13 |
| CCG                 | 28            | 5,11,29            | 0.39  | 25.15  |
| CCU                 | 29            | 6,28               | 7.99  | 125.19 |
| CGA                 | 6             | 5,10,20,28         | 3.95  | 40.76  |
| CGC                 | 6             | 5,17,21            | 1.53  | 43.18  |
| CGG                 | 5             | 6,11               | 6.90  | 261.93 |
| CGU                 | 6             | 5,29               | 0.51  | 44.20  |
| CUA                 | 20            | 10,21,28           | 6.77  | 82.17  |
| CUC                 | 21            | 17,20              | 10.04 | 258.80 |
| CUG                 | 20            | 5,11,21            | 1.00  | 87.95  |
| CUU                 | 21            | 6,20,29            | 10.91 | 257.92 |
| GAA                 | 12            | 1,8,13,14,39       | 1.93  | 16.24  |
| GAC                 | 8             | 12,13,16           | 2.15  | 14.55  |
| GAG                 | 13            | 8,12,15,40         | 16.58 | 116.60 |
| GAU                 | 8             | 2,12,13,41         | 2.68  | 14.01  |
| GCA                 | 1             | 2,12,14,39         | 6.04  | 47.52  |
| GCC                 | 2             | 1,8,16             | 3.42  | 20.65  |
| GCG                 | 1             | 2,13,15,40         | 3.40  | 50.16  |
| GCU                 | 2             | 1,41               | 1.77  | 22.30  |
| GGA                 | 14            | 1,12,15,16,39      | 13.23 | 75.72  |
| GGC                 | 16            | 8,14,15            | 1.22  | 14.00  |
| GGG                 | 15            | 13,14,16,40        | 11.76 | 121.42 |
| GGU                 | 16            | 2,14,15,41         | 1.79  | 13.43  |
| GUA                 | 39            | 1,12,14,40,41      | 18.95 | 114.23 |
| GUC                 | 41            | 8,16,39,40         | 2.55  | 15.62  |
| GUG                 | 40            | 13,15,39,41        | 10.00 | 123.18 |
| GUU                 | 41            | 2,39,40            | 1.05  | 17.12  |
| UAC                 | 38            | 9,27               | 1.78  | 31.14  |
| UAU                 | 38            | 33                 | 1.35  | 31.56  |
| UCA                 | 31            | 22,32,33           | 6.27  | 82.68  |
| UCC                 | 33            | 9,27,31,32,38      | 2.42  | 21.64  |
| UCG                 | 32            | 23,31,33,37        | 29.83 | 239.00 |
| UCU                 | 33            | 31,32              | 0.37  | 23.70  |
| UGC                 | 9             | 27,37,38           | 6.04  | 60.79  |
| UGG                 | 37            | 9,23,32            | 2.57  | 42.14  |
| UGU                 | 9             | 33,37              | 4.19  | 62.64  |
| UUA                 | 22            | 23,27,31           | 3.32  | 34.02  |
| UUC                 | 27            | 9,22,23,38         | 2.87  | 22.67  |
| UUG                 | 23            | 22,27,32,37        | 2.37  | 23.17  |
| UUU                 | 27            | 22,23,33           | 2.75  | 22.79  |

| <i>H.sapiens</i> |               |                        |          |          |
|------------------|---------------|------------------------|----------|----------|
| codon            | cognate tRNAs | near-cognate tRNAs     | <i>C</i> | <i>R</i> |
| AAA              | 23,24,25      | 5,7,17,22,35,36        | 1.93     | 9.63     |
| AAC              | 7             | 22,23,24,25,31         | 6.68     | 45.39    |
| AAG              | 22            | 3,7,23,24,25,26,33,34  | 10.95    | 43.88    |
| AAU              | 7             | 22,23,24,25            | 5.18     | 46.89    |
| ACA              | 35,36         | 5,17,23,24,25,33,34    | 3.23     | 13.54    |
| ACC              | 34            | 7,31,33,35,36          | 5.98     | 41.11    |
| ACG              | 33,34         | 3,22,26,35,36          | 3.11     | 19.8     |
| ACU              | 34            | 33,35,36               | 3.72     | 43.37    |
| AGA              | 5             | 3,17,23,24,25,31,35,36 | 7.7      | 25.58    |
| AGC              | 31            | 3,5,7                  | 2.73     | 31.65    |
| AGG              | 3             | 5,22,26,31,33,34       | 4.93     | 28.34    |
| AGU              | 31            | 3,5                    | 2.06     | 32.31    |
| AUA              | 17            | 5,23,24,25,26,35,36    | 6.15     | 24.91    |
| AUC              | 16            | 7,17,26,31             | 4.64     | 38.58    |
| AUG              | 26            | 3,17,22,33,34          | 4.51     | 32.07    |
| AUU              | 16            | 17,26                  | 2.56     | 40.67    |
| CAA              | 10            | 6,15,21,28             | 4.72     | 45.69    |
| CAC              | 15            | 10                     | 0.6      | 29.35    |
| CAG              | 10            | 6,15,19,28             | 5.16     | 45.25    |
| CAU              | 15            | 10                     | 0.6      | 29.35    |
| CCA              | 28            | 6,10,21                | 3.06     | 47.35    |
| CCC              | 28            | 15                     | 1.66     | 48.75    |
| CCG              | 28            | 6,10,19                | 3.5      | 46.91    |
| CCU              | 28            | -                      | 0.0      | 50.41    |
| CGA              | 6             | 10,21,28               | 2.66     | 42.77    |
| CGC              | 4             | 6,15                   | 2.44     | 41.89    |
| CGG              | 6             | 10,19,28               | 3.06     | 42.37    |
| CGU              | 4             | 6                      | 0.98     | 43.35    |
| CUA              | 21            | 6,10,19,28             | 4.74     | 48.44    |
| CUC              | 21            | 15,19                  | 3.21     | 49.96    |
| CUG              | 19            | 6,10,21,28             | 2.92     | 33.11    |
| CUU              | 21            | 19                     | 1.46     | 51.71    |
| GAA              | 11,12         | 1,8,14,40              | 2.66     | 23.38    |
| GAC              | 8             | 11,12,13               | 2.46     | 39.66    |
| GAG              | 12            | 1,8,11,13,39           | 6.42     | 48.96    |
| GAU              | 8             | 11,12                  | 1.59     | 40.52    |
| GCA              | 1             | 11,12,14,40            | 3.46     | 35.34    |
| GCC              | 1,2           | 8,13                   | 0.83     | 17.35    |
| GCG              | 1             | 12,13,39               | 2.55     | 36.25    |
| GCU              | 1,2           | -                      | 0.0      | 18.18    |
| GGA              | 14            | 1,11,12,13,40          | 4.33     | 35.02    |
| GGC              | 13            | 8,14                   | 2.39     | 46.36    |
| GGG              | 13            | 1,12,14,39             | 4.67     | 44.08    |
| GGU              | 13            | 14                     | 1.23     | 47.52    |
| GUA              | 40            | 1,11,12,14,39          | 4.5      | 34.3     |
| GUC              | 39            | 8,13,40                | 2.61     | 34.53    |
| GUG              | 39            | 1,12,13,40             | 3.36     | 33.78    |
| GUU              | 39            | 40                     | 0.96     | 36.18    |
| UAC              | 38            | 9,27                   | 1.92     | 40.75    |
| UAU              | 38            | -                      | 0.0      | 42.67    |
| UCA              | 32            | 20,29,30               | 3.43     | 31.5     |
| UCC              | 32            | 9,27,30,38             | 3.52     | 31.41    |
| UCG              | 30            | 18,32,37               | 2.8      | 28.26    |
| UCU              | 32            | 30                     | 1.12     | 33.81    |
| UGA              | 29            | 9,20,32,37             | 3.38     | 25.47    |
| UGC              | 9             | 27,29,37,38            | 5.8      | 43.5     |
| UGG              | 37            | 9,18,29,30             | 3.14     | 24.6     |
| UGU              | 9             | 29,37                  | 3.44     | 45.87    |
| UUA              | 20            | 18,27,29,32            | 3.6      | 28.02    |
| UUC              | 27            | 9,18,20,38             | 4.07     | 36.39    |
| UUG              | 18,20         | 27,30,37               | 1.63     | 15.41    |
| UUU              | 27            | 18,20                  | 2.3      | 38.16    |
